# Supplementary material
Source: Royal Society of Chemistry journal article supplement (doi:10.1039/d5nj04897d)
Supplement: d5nj04897d1.pdf [file d5nj04897d1.pdf]

## Supplemental Materials

### **Biopolymer-based N-doped carbonaceous bifunctional material for phenol removal: synergistic performance of adsorption and catalytic degradation**

**Fig. S1.** The EDX spectra of (a) uncoated sand, (b) chitosan-coated sand and (c) CCS-500 sample.

**Fig. S2.** SEM-EDX mapping of the shown representative area of uncoated sand sample with its elemental composition of C, O, Al, and Si. The scale bar represents 8  $\mu\text{m}$  in all images.

**Fig. S3.** SEM-EDX mapping of the shown representative area of chitosan-coated sand sample with its elemental composition of C, O, Al, and Si. The scale bar represents 100  $\mu\text{m}$  in all images.

**Fig. S4.** SEM-EDX mapping of the shown representative area of CSS-500 sample with its elemental composition of C, O, Al, and Si. The scale bar represents 100  $\mu\text{m}$  in all images.

**Fig. S5.** Wide scan XPS spectra of (a) chitosan coated sand sample, (b) uncoated sand sample and (c) CSS-500 sample.

**Fig. S6.** C 1s, N 1s and Si 2p XPS spectra of (a) chitosan coated sand sample, (b) uncoated sand sample and (c) CSS-500 sample.

**Fig. S7.** Effect of catalyst content on phenol removal by adsorption and catalytic oxidation of the CCS-500 sample. Operation parameters:  $[\text{Phenol}]_0 = 50$  ppm, catalyst = 100 g/L, PMS = 0.5 g/L, and temperature = 24  $^{\circ}\text{C}$ .

**Fig. S8.** Effect of PMS dosage on phenol removal by adsorption and catalytic oxidation of the CCS-500 sample. Operation parameters:  $[\text{Phenol}]_0 = 50$  ppm, catalyst = 100 g/L, PMS = 0.5 g/L, and temperature = 24  $^{\circ}\text{C}$ .

**Fig. S9.** Effect of initial phenol concentration on its removal by adsorption and catalytic oxidation of the CCS-500 sample. Operation parameters:  $[\text{Phenol}]_0 = 50$  ppm, catalyst = 100 g/L, PMS = 0.5 g/L, and temperature = 24  $^{\circ}\text{C}$ .

**Fig. S10.** Effect of initial solution pH on phenol removal by adsorption and catalytic oxidation of the CCS-500 sample. Operation parameters:  $[\text{Phenol}]_0 = 50$  ppm, catalyst = 100 g/L, PMS = 0.5 g/L, and temperature = 24  $^{\circ}\text{C}$ .

**Fig. S11.** Baseline-corrected Raman spectra of the CCS-600 sample measured at the indicated 5 positions.

**Fig. S12.** Baseline-corrected Raman spectra of the CCS-700 sample measured at the indicated 5 positions.

**Fig. S13.** Baseline-corrected Raman spectra of the CCS-800 sample measured at the indicated 5 positions.

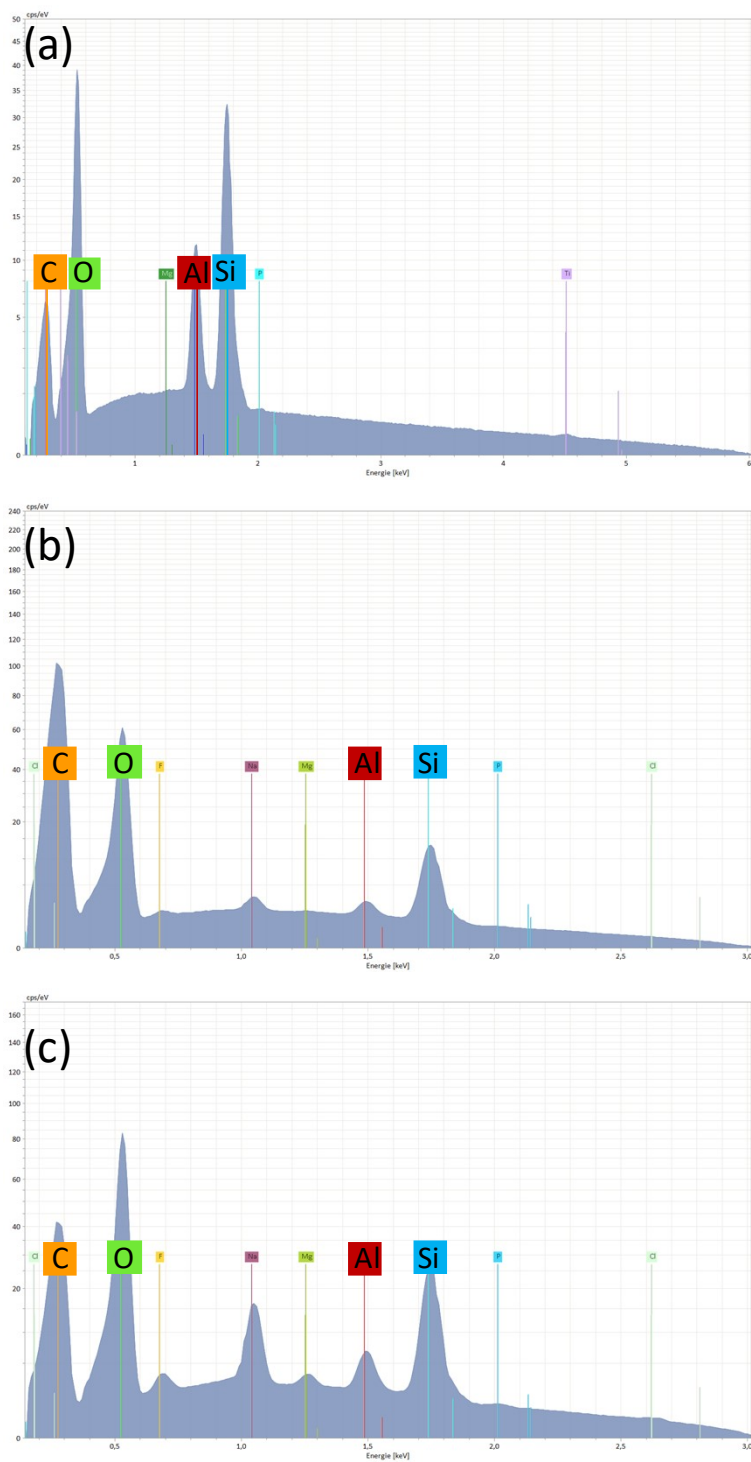

**Fig. S1.** The EDX spectra of (a) uncoated sand, (b) chitosan-coated sand and (c) CCS-500 sample.

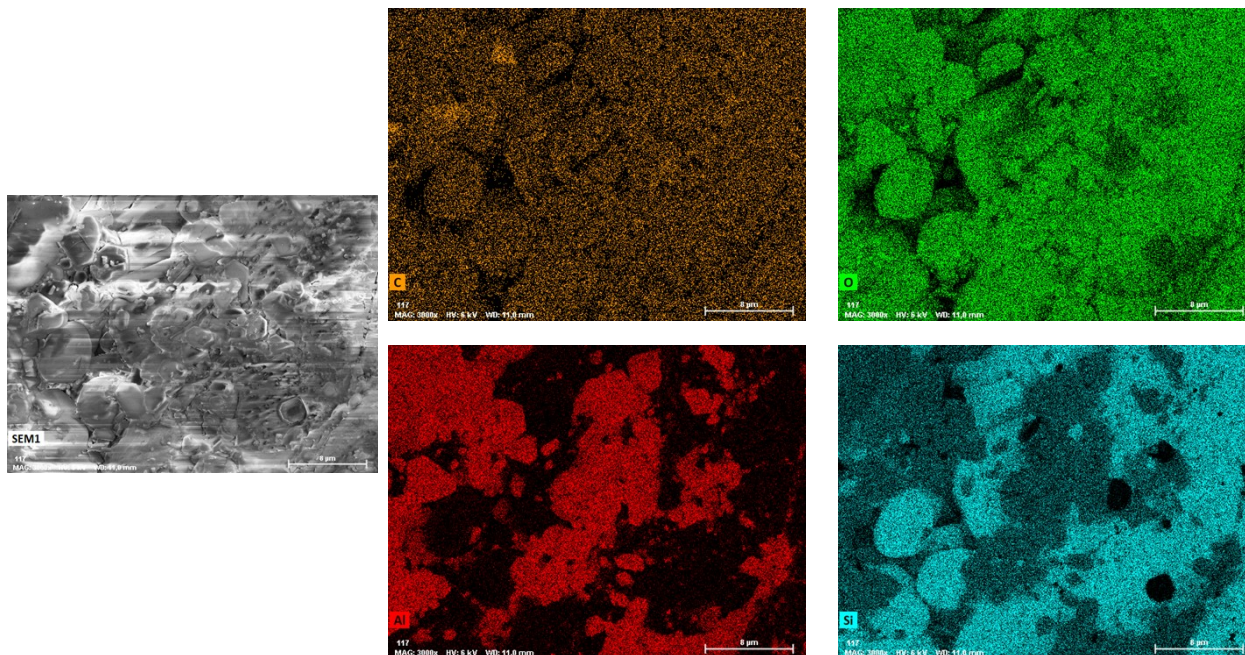

**Fig. S2.** SEM-EDX mapping of the shown representative area of uncoated sand sample with its elemental composition of C, O, Al, and Si. The scale bar represents 8 µm in all images.

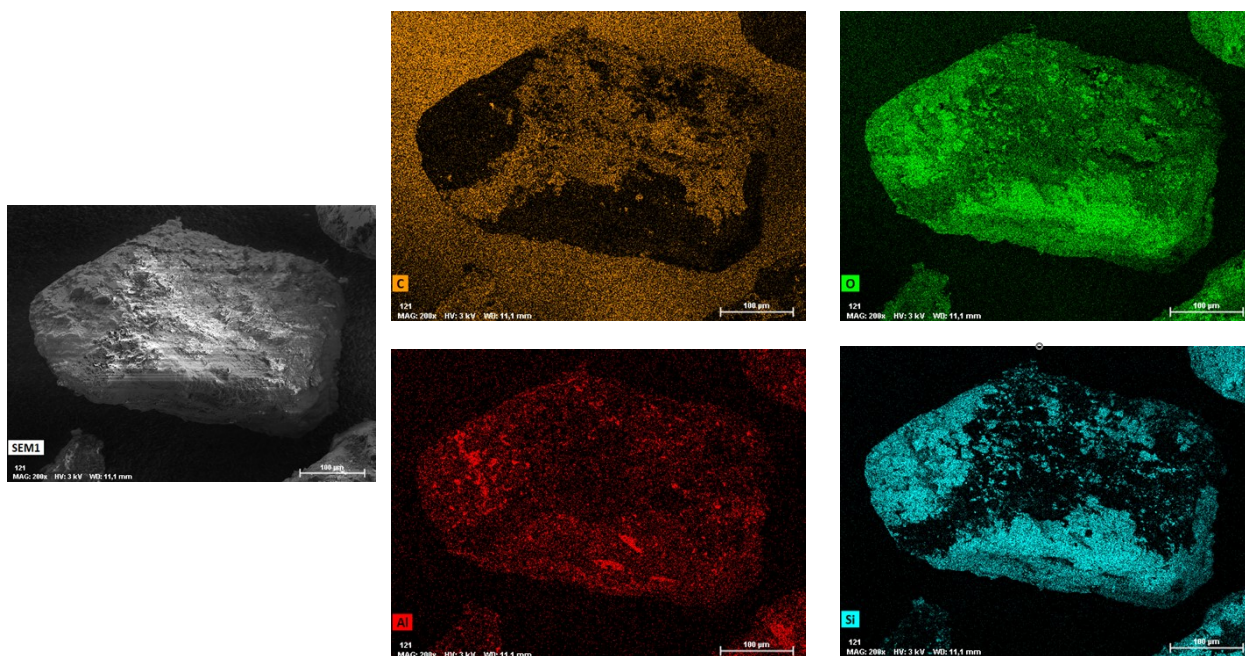

**Fig. S3.** SEM-EDX mapping of the shown representative area of chitosan-coated sand sample with its elemental composition of C, O, Al, and Si. The scale bar represents 100 µm in all images.

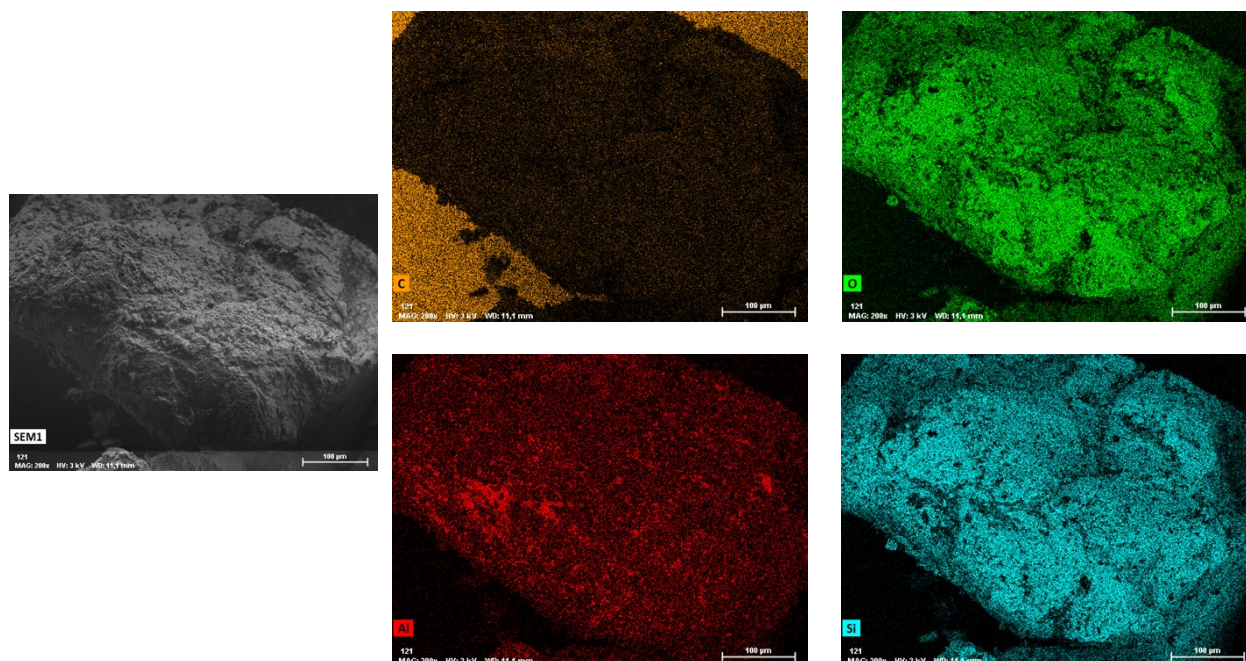

**Fig. S4.** SEM-EDX mapping of the shown representative area of CSS-500 sample with its elemental composition of C, O, Al, and Si. The scale bar represents 100  $\mu\text{m}$  in all images.

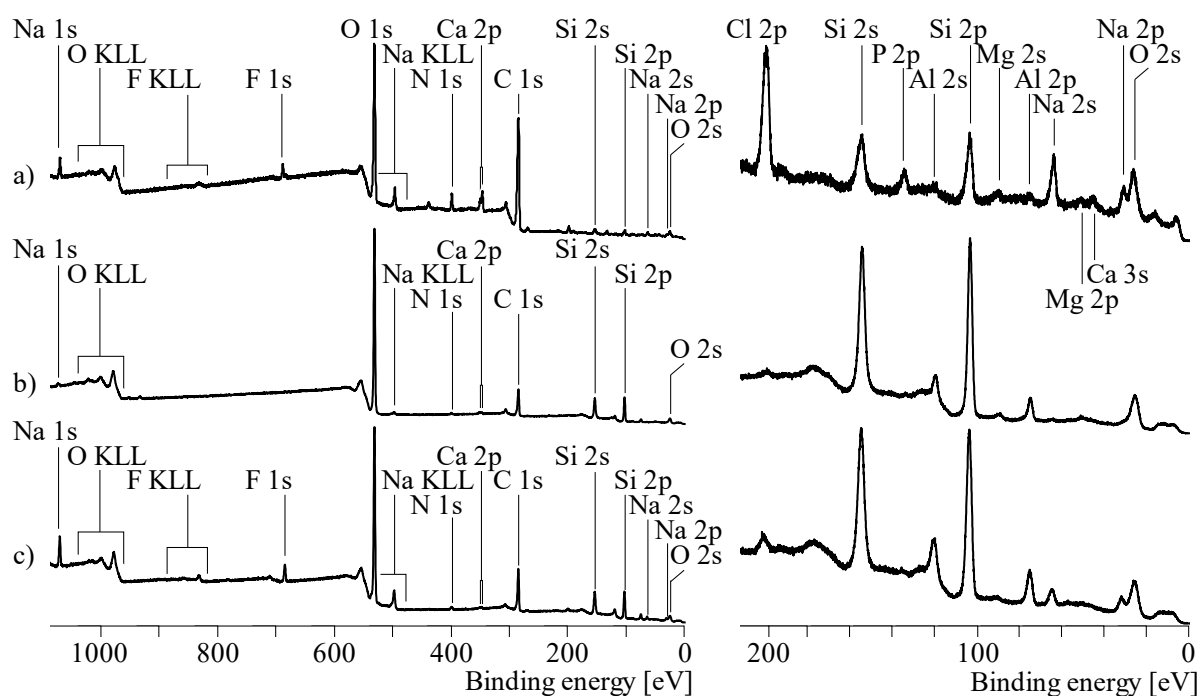

**Fig. S5.** Wide scan XPS spectra of (a) chitosan coated sand sample, (b) uncoated sand sample and (c) CSS-500 sample.

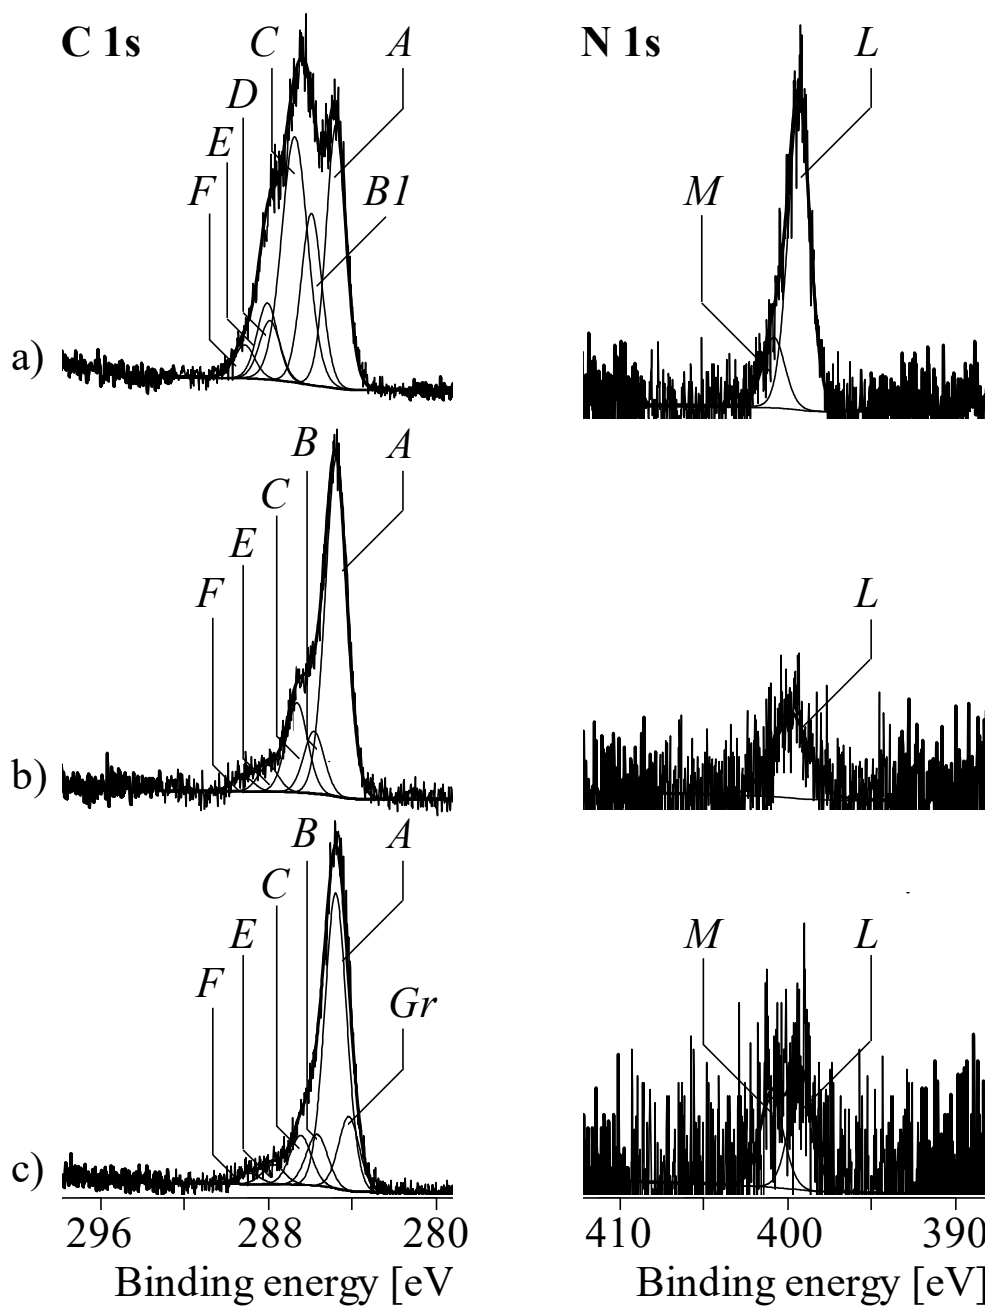

**Fig. S6.** C 1s, N 1s and Si 2p XPS spectra of (a) chitosan coated sand sample, (b) uncoated sand sample and (c) CSS-500 sample.

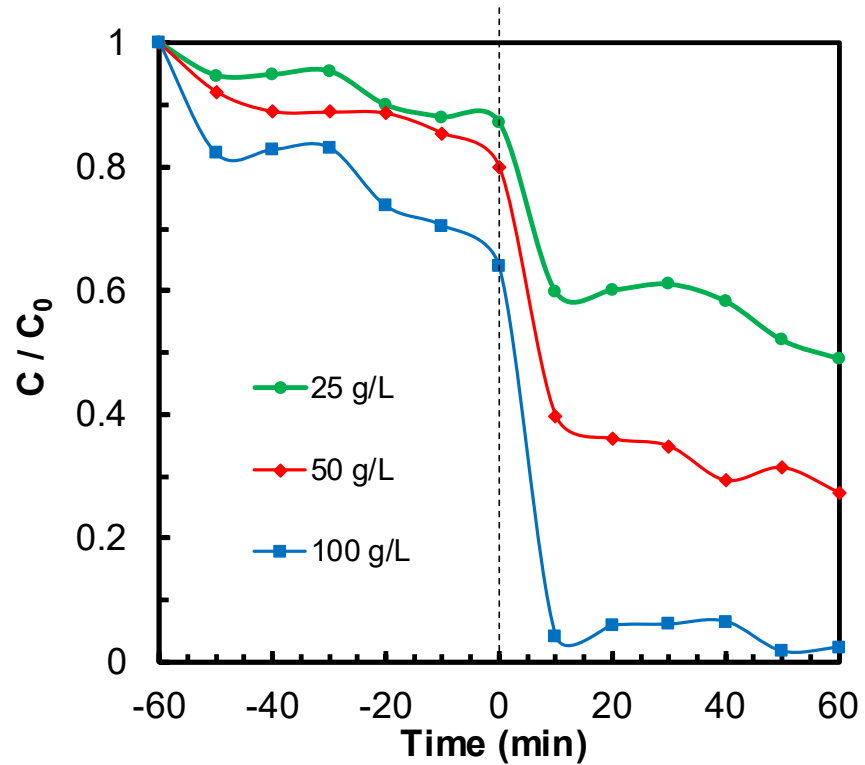

**Fig. S7.** Effect of catalyst content on phenol removal by adsorption and catalytic oxidation of the CCS-500 sample. Operation parameters:  $[\text{Phenol}]_0 = 50 \text{ ppm}$ , catalyst = 100 g/L, PMS = 0.5 g/L, and temperature = 24 °C.

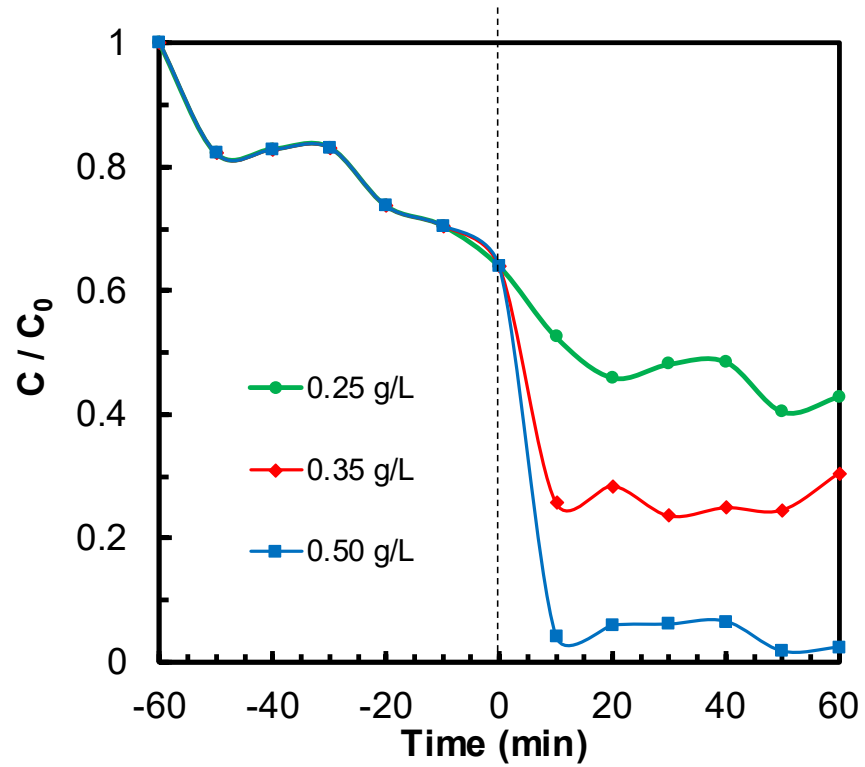

**Fig. S8.** Effect of PMS dosage on phenol removal by adsorption and catalytic oxidation of the CCS-500 sample. Operation parameters:  $[\text{Phenol}]_0 = 50$  ppm, catalyst = 100 g/L, PMS = 0.5 g/L, and temperature = 24 °C.

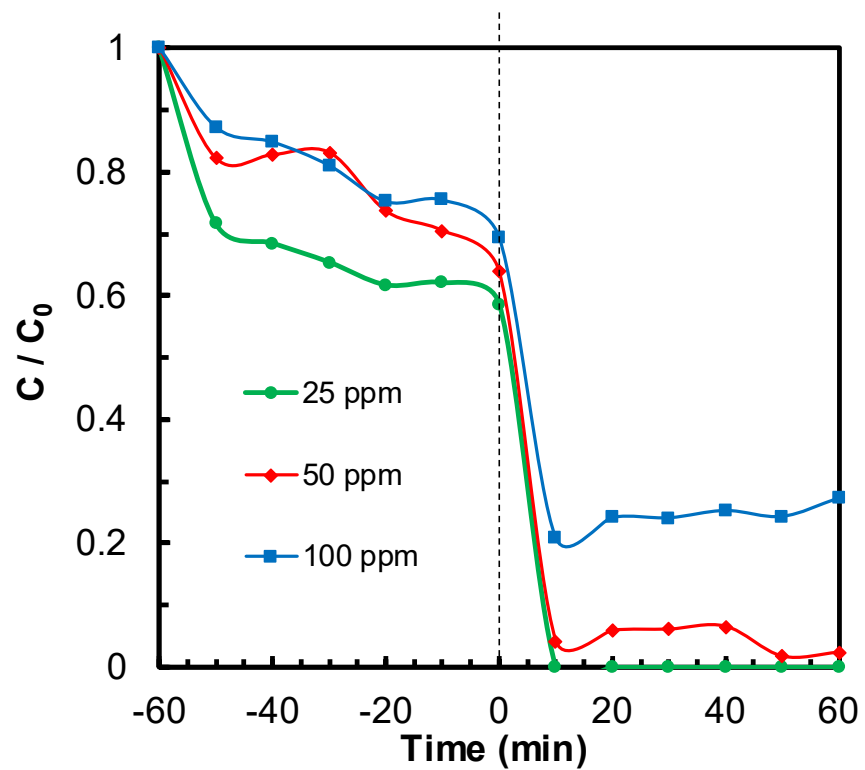

**Fig. S9.** Effect of initial phenol concentration on its removal by adsorption and catalytic oxidation of the CCS-500 sample. Operation parameters:  $[\text{Phenol}]_0 = 50$  ppm, catalyst = 100 g/L, PMS = 0.5 g/L, and temperature = 24 °C.

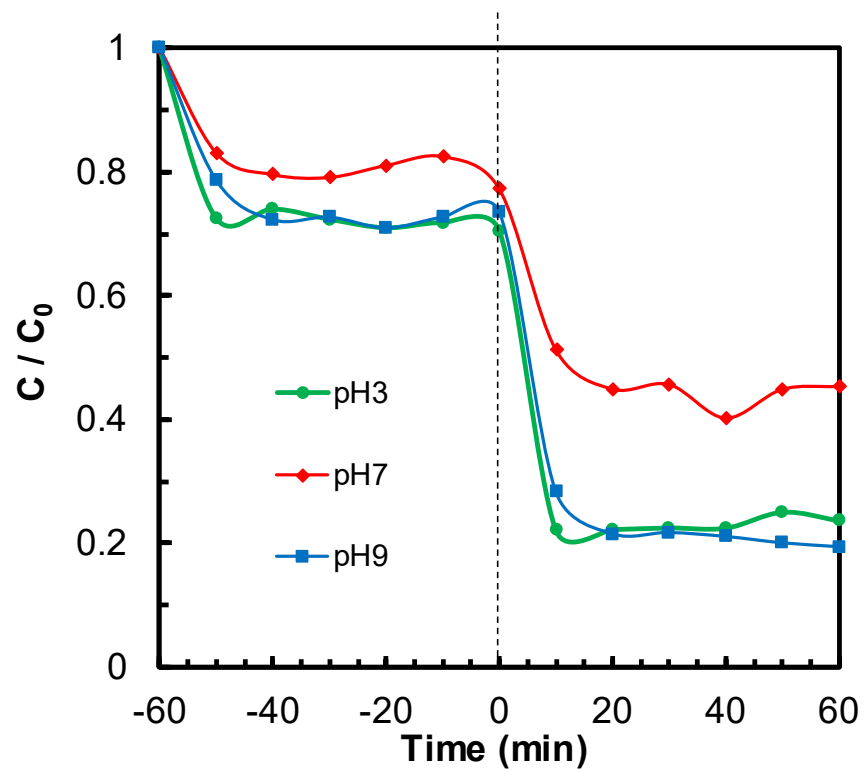

**Fig. S10.** Effect of initial solution pH on phenol removal by adsorption and catalytic oxidation of the CCS-500 sample. Operation parameters:  $[\text{Phenol}]_0 = 50$  ppm, catalyst = 100 g/L, PMS = 0.5 g/L, and temperature = 24 °C.

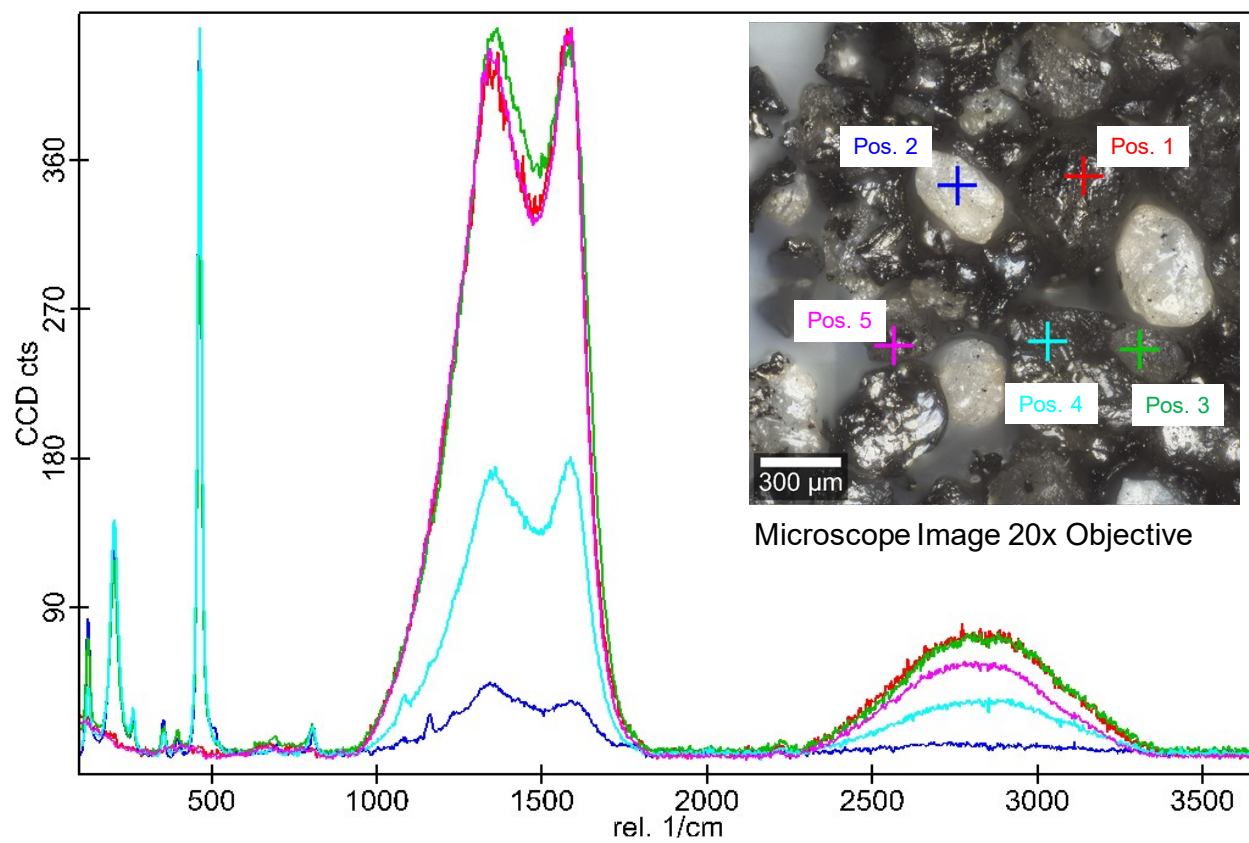

**Fig. S11.** Baseline-corrected Raman spectra of the CCS-600 sample measured at the indicated 5 positions.

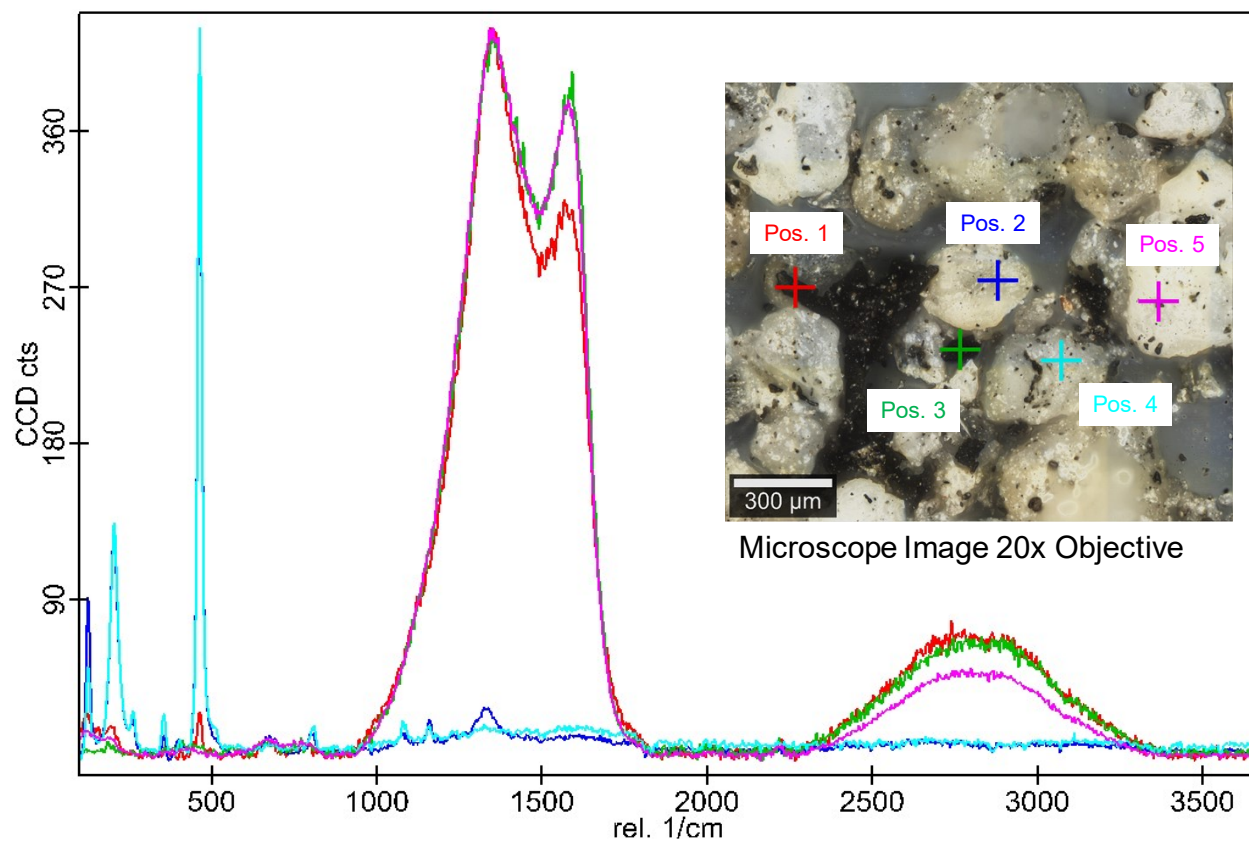

**Fig. S12.** Baseline-corrected Raman spectra of the CCS-700 sample measured at the indicated 5 positions.

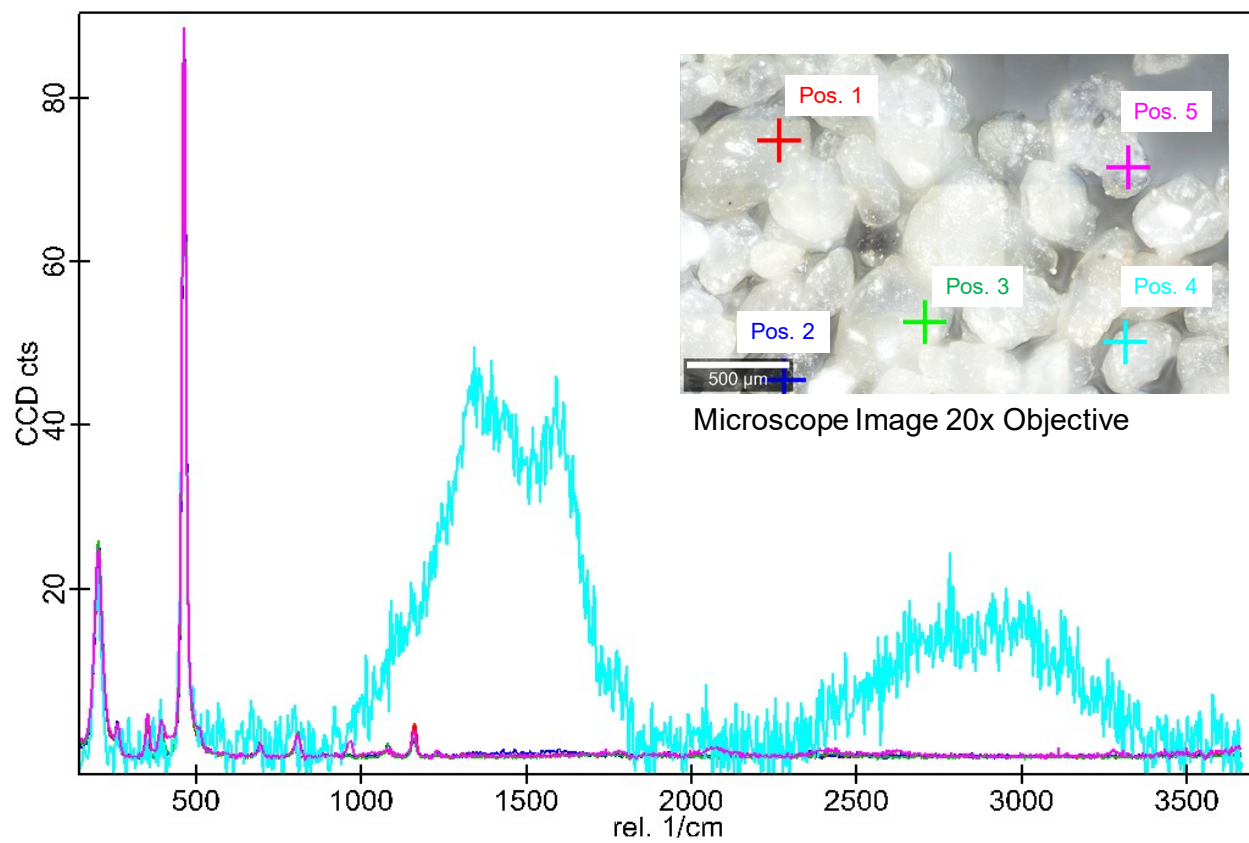

**Fig. S13.** Baseline-corrected Raman spectra of the CCS-800 sample measured at the indicated 5 positions.
